# Supplementary material for: Fractionation of Cynara cardunculus L. by Acidified Organosolv Treatment for the Extraction of Highly Digestible Cellulose and Technical Lignin
Source: MDPI journal article supplement (doi:10.3390/su13168714), 2021-08-04
Supplement: s1 [file s1]

Archive with 1 entries (1 files):
- sustainability-1317334-supplementary.pdf
