# Supplementary material for: Fractionation of Cynara cardunculus L. by Acidified Organosolv Treatment for the Extraction of Highly Digestible Cellulose and Technical Lignin
Source: MDPI journal article supplement (doi:10.3390/su13168714), 2021-08-04
Supplement: s1 [file s1 › sustainability-1317334-supplementary.pdf]

**Table S1. CP characterization after organosolv treatment.**

| <b>Run</b> | <b>Cellulose</b> | <b>Hemicellulose</b> | <b>Lignin</b> |
|------------|------------------|----------------------|---------------|
| 1          | 95.93%           | 0.00%                | 4.07%         |
| 2          | 78.05%           | 0.00%                | 21.95%        |
| 3          | 87.06%           | 0.06%                | 12.88%        |
| 4          | 77.82%           | 2.74%                | 19.44%        |
| 5          | 95.71%           | 0.03%                | 4.26%         |
| 6          | 92.67%           | 0.00%                | 7.33%         |
| 7          | 92.47%           | 0.03%                | 7.50%         |
| 8          | 90.38%           | 0.00%                | 9.62%         |
| 9          | 90.58%           | 0.00%                | 9.42%         |
| 10         | 91.09%           | 0.08%                | 8.83%         |
| 11         | 93.91%           | 0.01%                | 6.08%         |
| 12         | 93.33%           | 0.01%                | 6.66%         |
| 13         | 81.77%           | 8.20%                | 10.03%        |
| 14         | 94.09%           | 0.00%                | 5.91%         |
| 15         | 85.36%           | 2.29%                | 12.35%        |
| 17         | 92.79%           | 0.00%                | 7.21%         |
| 18         | 90.97%           | 0.00%                | 9.03%         |
| 19         | 97.50%           | 0.00%                | 2.50%         |
| 20         | 90.23%           | 0.00%                | 9.77%         |
